# Supplementary material for: Using Twitter Data for the Study of Language Change in Low-Resource Languages. A Panel Study of Relative Pronouns in Frisian
Source: Front Artif Intell. 2021 Apr 15;4:644554. doi: 10.3389/frai.2021.644554 (PMC8083371; doi:10.3389/frai.2021.644554)
Supplement: Supplementary file 2 [file Data_Sheet_2.xlsx]

## Sheet: df
usern	final dataset	birth_year	gender	estimation	writing	count	perc_Frisian
1	1	1997	2	0	2	1606	23.3499
2	1	1968	2	0	1	8608	21.3987
3	1	1954	1	0	1	9171	91.4949
4	1	2000	2	0	2	6626	10.4739
5	1	1991	1	0	2	4783	30.0439
6	1	1978	2	1	2	164	23.1707
7	1	1998	1	1	2	8186	17.6765
8	1	1993	2	0	2	25815	18.0709
9	1	1972	2	0	1	492	80.4878
10	1	1994	2	0	2	7125	25.6842
11	1	1946	2	1	1	194	57.2165
12	0	1968	2	0	2	457	50.9847
13	1	1974	2	0	1	953	64.4281
14	1	1947	2	0	1	393	96.6921
15	0	1988	2	1	2	844	15.7583
16	1	1990	1	0	2	1873	43.8868
17	1	1959	2	0	1	337	60.8309
18	1	1997	2	0	2	9747	23.3405
19	1	1954	1	0	1	4018	79.5669
20	1	1964	2	0	1	4199	45.3441
21	1	1978	1	1	2	498	26.1044
22	1	1974	1	0	1	16536	8.85341
23	1	1988	2	0	2	1626	27.4908
24	1	1958	2	1	1	225	96
25	1	1960	2	0	1	107	88.785
26	1	1946	1	1	1	40887	7.10739
27	1	1991	1	0	2	1904	38.1828
28	1	1997	1	0	2	487	40.0411
29	1	1998	1	0	2	9201	30.7358
30	1	1964	1	0	2	1449	17.8054
31	0	1993	2	0	2	2378	13.1203
32	1	1993	1	0	2	32644	5.84181
33	0	1978	1	1	1	157	61.7834
34	1	1976	2	0	1	15668	56.7207
35	0	1975	2	1	1	254	29.5276
36	1	1967	1	0	1	815	74.9693
37	1	1945	1	0	1	17511	88.2074
38	1	1978	2	0	1	7133	14.2717
39	1	1965	2	0	1	23554	8.16846
40	1	1970	1	0	1	687	39.8836
41	1	1985	1	0	1	297	47.8114
42	1	1967	2	0	1	620	87.9032
43	0	2000	1	0	2	904	21.4602
44	1	1946	1	0	1	167	73.6527
45	1	1997	2	0	2	1496	25.1337
46	1	1994	2	0	1	3250	46.0923
47	0	1990	2	0	2	1683	10.1604
48	1	1983	2	0	2	1111	35.1035
49	1	1957	2	0	1	13555	86.3814
50	1	1997	2	0	2	10109	15.4911
51	1	1969	1	0	1	3896	63.0903
52	0	1996	1	0	1	232	42.6724
53	1	1994	1	0	2	4124	18.4772
54	1	1995	1	0	2	2268	22.3104
55	1	1993	1	0	2	6172	17.4822
56	1	1959	2	0	1	5620	86.9395
57	1	1948	2	1	1	1898	72.2866
58	1	1967	2	0	2	314	49.0446
59	1	1965	2	0	1	13231	75.565
60	1	1987	1	0	1	1226	45.106
61	1	1946	2	0	1	1098	82.878
62	1	1996	1	0	2	5610	45.4724
63	0	1996	1	0	2	889	22.6097
64	1	1980	2	0	1	1218	41.7898
65	1	1963	2	0	1	1093	87.2827
66	1	1994	1	0	2	8776	36.4289
67	1	1996	1	0	2	1645	24.6809
68	1	1966	2	1	1	1103	25.8386
69	1	1996	1	1	2	3658	23.2367
70	1	1968	2	0	1	1461	35.2498
71	1	1990	1	0	2	3996	21.7968
72	1	1952	2	0	1	2156	22.449
73	1	1970	2	0	1	481	52.8067
74	0	1983	1	0	2	130	30
75	1	1997	2	1	2	1577	21.8136
76	1	1997	2	1	2	3768	9.92569
77	1	1995	1	0	2	2865	26.7016
78	1	1996	2	0	2	1038	42.0039
79	1	1957	1	0	1	602	83.887
80	1	1954	2	1	1	6709	42.0331
81	1	1956	1	0	1	1156	85.7266
82	1	1963	2	0	1	8282	48.3337
83	1	1989	2	0	2	1112	62.9496
84	1	1956	1	0	1	411	82.4818
85	1	1956	2	0	1	430	57.6744
86	1	1981	1	0	1	429	78.5548
87	0	1983	2	1	2	113	36.2832
88	1	1976	1	0	1	5951	38.5313
89	1	1998	1	0	2	4672	17.2303
90	1	1997	1	1	2	2047	17.8798
91	1	1980	1	1	2	655	63.5115
92	1	1982	1	0	1	2519	67.9635
93	1	1961	2	0	1	1221	39.8034
94	1	1977	1	0	2	1006	32.6044
95	1	1998	1	0	2	6032	9.15119
96	1	1956	2	0	1	217	37.3272
97	0	1958	1	1	1	41	41.4634
98	0	1982	2	0	2	172	23.2558
99	1	1979	2	0	1	916	53.2751
100	1	1996	2	0	2	2245	22.2717
101	1	1984	2	0	1	221	70.5882
102	1	1982	2	0	2	410	57.561
103	1	1996	1	0	2	871	22.2732
104	1	1985	1	0	1	276	67.7536
105	1	1967	1	0	1	4906	79.0257
106	1	1976	2	1	1	1944	28.1893
107	1	1996	1	0	2	9519	37.4829
108	1	1994	1	0	2	4024	17.0726
109	1	1995	1	0	2	699	30.7582
110	1	1971	2	0	1	2519	61.3736
111	1	1993	2	0	2	2546	26.4729
112	1	1956	1	0	1	7068	66.794
113	1	1996	1	0	2	3320	23.7349
114	1	1986	2	0	2	3784	23.4937
115	1	1961	2	1	1	191	68.0628
116	1	1998	2	0	1	3975	22.2138
117	1	1989	2	0	2	1876	29.9041
118	1	1955	2	0	1	64	78.125
119	1	1985	2	0	2	8157	19.4802
120	1	1997	2	0	2	11998	7.81797
121	0	1996	2	0	2	2760	6.88406
122	1	1973	2	0	2	804	66.2935
123	1	1972	2	1	2	641	74.883
124	1	1973	2	0	1	5485	62.1696
125	1	1995	1	0	1	988	16.8016
126	1	1990	1	1	2	708	25.9887
127	1	1995	1	0	2	5819	22.2375
128	1	1983	2	0	1	4172	34.6836
129	0	1996	2	0	2	879	49.4881
130	0	1968	2	0	1	124	25
131	1	1976	1	0	2	1991	64.7413
132	1	1997	2	1	2	17101	15.5371
133	1	1991	2	0	1	3285	21.8874
134	0	1974	1	1	2	1118	31.4848
135	0	1929	1	0	1	372	91.3978
136	1	1983	2	0	2	3530	12.3796
137	1	1999	1	0	2	4755	23.9958
138	0	1987	1	0	1	181	32.0442
139	1	1950	1	0	1	3282	94.2413
140	1	1996	1	0	2	2577	19.8681
141	1	1963	1	0	1	2202	19.6639
142	0	1996	1	0	2	1231	9.01706
143	0	1996	2	0	2	4302	6.13668
144	1	1963	1	0	1	1159	65.5738
145	1	1981	2	0	1	218	58.2569
146	1	1990	1	1	2	2549	28.9525
147	1	1961	2	0	1	1800	74.9444
148	1	1986	2	0	1	1978	75.1769
149	1	1952	2	1	1	189	77.2487
150	1	1999	1	1	2	869	21.8642
151	1	1979	2	0	1	4261	70.2183
152	1	1950	1	0	1	288	70.1389
153	0	1978	1	0	2	1311	18.688
154	0	1968	1	1	2	267	22.4719
155	1	1996	1	0	2	14369	11.2464
156	1	1985	1	1	2	4319	51.3082
157	1	1982	1	0	1	3729	33.387
158	1	1955	2	0	1	5571	80.3805
159	0	1971	2	0	2	450	26.8889
160	1	1966	2	1	1	1101	71.1172
161	1	1990	1	0	2	4849	18.9936
162	1	1997	1	0	2	8397	25.9021
163	1	1972	1	0	1	5580	86.6846
164	1	1975	1	0	1	4187	87.0313
165	1	1957	1	0	1	1029	43.829
166	1	1968	2	0	1	12995	49.4421
167	0	1990	2	0	2	2495	9.45892
168	1	1994	1	0	2	2819	21.0004
169	1	1986	2	0	1	751	31.4248
170	1	1958	1	0	2	4096	68.5059
171	1	1995	2	0	2	2721	22.5285
172	1	1989	1	0	1	3875	70.2968
173	1	1982	1	0	1	3254	50.3073
174	1	1993	2	0	2	2752	46.6933
175	1	1995	1	1	2	782	30.179
176	1	1961	1	0	1	263	57.7947
177	1	1983	1	1	2	658	43.3131
178	1	1997	1	0	2	884	34.9548
179	1	1998	1	0	2	1080	40
180	1	1960	1	0	2	2409	53.7152
181	1	1959	1	0	1	4278	18.9107
182	1	1995	1	0	2	710	37.7465
183	0	1992	1	1	2	197	37.0558
184	0	1996	2	0	2	1688	14.8697
185	1	1997	2	1	2	12593	19.63
186	1	1983	1	1	1	939	33.0138
